# Supplementary material for: Protocol of the VICTORIA study: personalized vitamin D supplementation for reducing or preventing fatigue and enhancing quality of life of patients with colorectal tumor - randomized intervention trial
Source: Springer Nature journal article supplement (doi:10.1186/s12885-020-07219-z), 2020-08-08
Supplement: MOESM1 [file 18259266]

## **Additional File 1**

List of authorities involved in the approval of the trial.

### **Competent Ethics Committee (“Federführende Ethikkommission”):**

- State Chamber of Medicine in Rheinland-Palatinate (Ethikkommission der Landesärztekammer Rheinland-Pfalz), Deutschhausplatz 3, 55116 Mainz

### **Local Ethics Committee (“Beteiligte Ethikkommission”):**

- Chamber of Medicine Westfalen-Lippe (Ethikkommission der Ärztekammer Westfalen-Lippe), Gartenstr. 210 – 214, 48147 Münster

### **National Competent Authority for the approval of clinical drug trials in Germany:**

- The Federal Institute for Drugs and Medical Devices (Bundesinstitut für Arzneimittel und Medizinprodukte, BfArM), Kurt-Georg-Kiesinger-Allee 3, 53175 Bonn
